# Supplementary material
Source: PubMed Central journal article supplement (PMC2838490)
Supplement: NIHMS141066-supplement-03.pdf [file NIHMS141066-supplement-03.pdf]

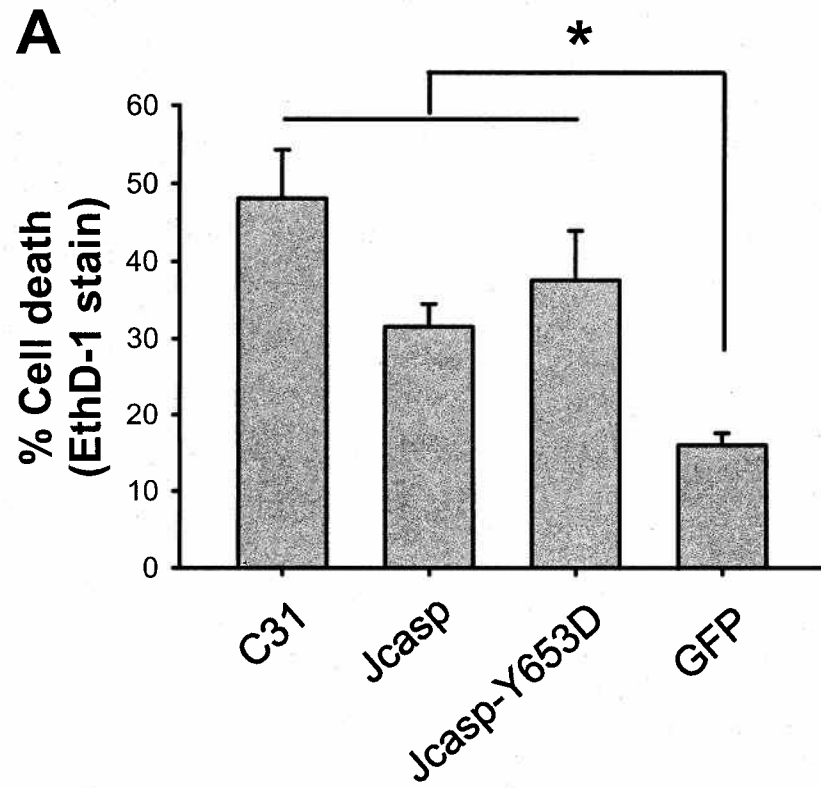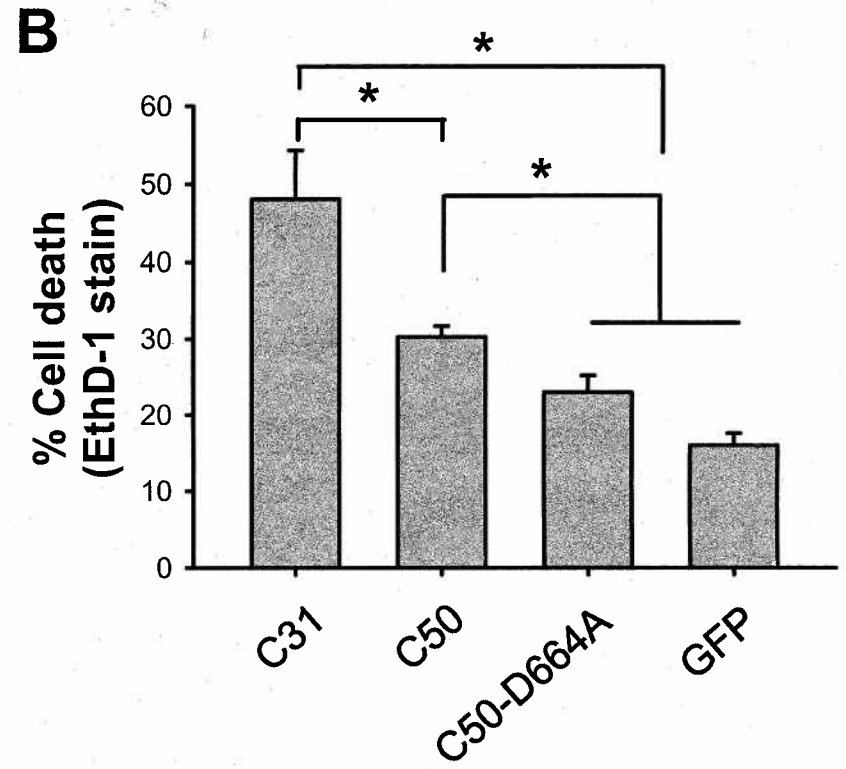

Supplementary Fig. 3. (A) Cytotoxicity following Jcasp and C31 expression. GFP-stabilized Jcasp or C31 fragments were expressed in N2A cells and assessed for cell death by ethidium homodimer staining. C31 showed the highest level of cell death, with Jcasp and Jcasp-Y653D peptides showing significant but lower levels of toxicity (\* $p \leq 0.001$  one way ANOVA, post-hoc Tukey). (B) N2A cells were transiently transfected with GFP-stabilized C31, C50, and C50-D664A mutant. The ethidium homodimer staining showed cytotoxicity following C31 and C50 expression. However, toxicity was lost in C50-D664A transfected cells (\* $p < 0.001$  one way ANOVA, post-hoc Tukey).
